# Supplementary material
Source: Research Square preprint supplement (doi:10.21203/rs.3.rs-10221135/v1)
Supplement: Supplementary file 1 [file 17aa2cd340183749cea9f4f7.docx]

**Additional file 1. STROBE Statement — Checklist of Items for Cross-Sectional Studies**

*Study: Oral health attitudes and clinical periodontal status in Turkish undergraduate dental students: discordance between self-reported behaviour and clinical findings — a cross-sectional study*

| **Section** | **Item No.** | **Recommendation** | **Location in Manuscript** |
| --- | --- | --- | --- |
| **TITLE AND ABSTRACT** | | | |
|  | **1a** | Indicate the study's design with a commonly used term in the title or the abstract | Title: '...A Cross-Sectional Study Using the HU-DBI'; Abstract, Methods: 'This cross-sectional study enrolled...' |
|  | **1b** | Provide an informative, balanced abstract summarising what was done and what was found | Abstract (structured: Background, Methods, Results, Conclusions) |
| **INTRODUCTION** | | | |
|  | **2** | Explain the scientific background and rationale for the investigation being reported | Background, paragraphs 1–5 |
|  | **3** | State specific objectives, including any prespecified hypotheses | Background, final paragraph (study aim stated; no formal hypothesis prespecified) |
| **METHODS** | | | |
|  | **4** | Present key elements of study design early in the paper | Methods: Study Design and Setting, paragraph 1 |
|  | **5** | Describe the setting, locations, and relevant dates, including periods of data collection | Methods: Study Design and Setting -- Istanbul University Faculty of Dentistry, spring semester 2018-2019 |
|  | **6*** | Give the eligibility criteria, and the sources and methods of selection of participants | Methods: Participants — inclusion/exclusion criteria listed; convenience sampling of entire eligible student cohort (n = 264 enrolled); nine non-attenders for clinical examination (two declined, seven absent) |
|  | **7** | Clearly define all outcomes, exposures, predictors, potential confounders, and effect modifiers; give diagnostic criteria if applicable | Methods: HU-DBI Questionnaire; clinical periodontal categories defined using thresholds informed by available examination variables (PI, GI, PPD); full 2017 World Workshop classification[30,31] was not possible as bleeding on probing was not recorded as a binary variable; mean GI per individual served as the surrogate gingivitis variable |
|  | **8*** | For each variable of interest, give sources of data and details of methods of assessment; describe comparability if more than one group | Methods: Clinical Examination (intra-examiner calibration ICC range 0.87–0.91; inter-examiner ICC range 0.84-0.86 (all parameters: PI, GI, PPD); HU-DBI Questionnaire (validated modified Turkish version) |
|  | **9** | Describe any efforts to address potential sources of bias | Methods: social desirability bias minimized by  anonymous questionnaire administration prior to clinical examination; non-response low (n = 9,  3.4%); smoking confounding addressed by sensitivity analysis restricted to non-smokers (Additional file 3); Type I error controlled  by BH-FDR correction across item-level and  pairwise comparisons |
|  | **10** | Explain how the study size was arrived at | Methods: Statistical Analysis — no a priori power  calculation performed (convenience sample of entire eligible cohort); post-hoc sensitivity analysis  indicates >80% power to detect rank-biserial  r ≥ 0.20 with n = 130 per group at α = 0.05 |
|  | **11** | Explain how quantitative variables were handled in the analyses | Methods: Statistical Analysis -- Shapiro-Wilk normality testing; non-parametric methods used throughout; Spearman rs with 95% CIs via Fisher's z-transformation |
|  | **12*** | Describe all statistical methods, including those used to control for confounding | Methods: Statistical Analysis -- Mann-Whitney U test, rank-biserial correlation r, Chi-square/Fisher's exact test, Spearman rs, BH-FDR correction at q < 0.05 |
| **RESULTS** | | | |
|  | **13*** | Report numbers of individuals at each stage of the study | Results: Participant Characteristics; Additional file 2 (STROBE-compliant participant flow diagram); n = 264 HU-DBI, n = 255 clinical examination (response rate 96.6%; 2 declined, 7 absent on the examination day); clinical examination subgroups: CF n=70; CM n=55; PF n=68; PM n=62 |
|  | **14*** | Give characteristics of study participants and information on exposures and potential confounders; indicate the number of participants with missing data for each variable of interest | Results: Participant Characteristics; Table 2 (demographics, smoking); Table 3 (HU-DBI scores and clinical indices); no missing data for primary outcomes |
|  | **15*** | Report numbers of outcome events or summary measures | Results: Clinical Periodontal Indices; Table 3 (PI and GI medians and IQR by subgroup); Table 5 (periodontal status distribution approximated using available examination variables; classification informed by 2017 World Workshop criteria[30,31]) |
|  | **16** | Give unadjusted estimates and, if applicable, confounder-adjusted estimates and their precision | Results: all comparisons reported with effect sizes (rank-biserial r) and 95% CIs; Spearman rs with 95% CI via Fisher's z-transformation |
|  | **17** | Report other analyses done -- e.g. sensitivity analyses or subgroup analyses | Results: PI-GI Spearman correlation computed overall and within each of four subgroups; non-smoker sensitivity analysis restricted to HU-DBI comparisons (Additional file 3); PI and GI effects were too large for smoking confounding to be a plausible explanation (r = 0.978–1.000); within-group correlation coefficients (Additional file 5) |
| **DISCUSSION** | | | |
|  | **18** | Summarise key results with reference to study objectives | Discussion, paragraph 1 |
|  | **19** | Discuss limitations of the study, taking into account sources of potential bias or imprecision | Discussion, Limitations paragraph — six limitations in the following order: (1) anonymous questionnaire precluding individual-level HU-DBI–clinical linkage (stated first as primary limitation); (2) cross-sectional design precluding causal inference; (3) clinical periodontal categories approximated — bleeding on probing not recorded as a binary variable, full 2017 World Workshop classification not possible; mean GI surrogacy justified in Discussion with reference to experimental gingivitis literature[32] and established gingivitis case definitions[33]; (4) absence of hormonal status data; (5) single-institution convenience sampling; (6) pre-pandemic data (2018–2019) limiting generalisability to current cohorts. Additional: GI as surrogate for binary BOP; social desirability bias in self-report |
|  | **20** | Give a cautious overall interpretation of results considering objectives, limitations, multiplicity of analyses, results from similar studies, and other relevant evidence | Discussion, paragraphs 2-7 (academic year effect, gender reversal, hormonal factors as possible explanation, between-group heterogeneity in PI–GI correlation, discordance between questionnaire-based and clinical measures, curriculum implications) |
|  | **21** | Discuss the generalisability (external validity) of the study results | Discussion, final paragraph before Conclusion:  generalisability acknowledged as limited by single-institution convenience sampling; contextualised within Turkey's expanding dental education landscape (105 faculties, >9,000 students annually as of 202313); multi-centre replication recommended |
| **OTHER INFORMATION** | | | |
|  | **22** | Give the source of funding and the role of the funders for the present study | Title Page: Funding -- None declared |

** Item applies specifically to cross-sectional studies. BH-FDR = Benjamini–Hochberg false discovery rate; GI = Gingival Index; HU-DBI = Hiroshima University–Dental Behavioral Inventory; ICC = intraclass correlation coefficient; PI = Plaque Index; PPD = probing pocket depth; rs = Spearman rank correlation coefficient; SRH = Scheirer–Ray–Hare non-parametric two-way test.*

*Reference: von Elm E, et al. Strengthening the Reporting of Observational Studies in Epidemiology (STROBE) statement: guidelines for reporting observational studies. Lancet. 2007;370(9596):1453-7.*
