# Supplementary material
Source: Research Square preprint supplement (doi:10.21203/rs.3.rs-10221135/v1)
Supplement: Supplementary file 2 [file 6f917231e56316ef236bae20.docx]

| **Additional file 3. Non-Smoker Sensitivity Analysis (HU-DBI, n=206)** | | | | | | |
| --- | --- | --- | --- | --- | --- | --- |
| *Non-smokers: Clinical Female (CF)=64, Clinical Male (CM)=45, Preclinical Female (PF)=55, Preclinical Male (PM)=42 (total n = 206). The overall Clinical vs Preclinical comparison and the CM vs PM comparison remained significant after BH-FDR correction (both q<0.05). The Female vs Male comparison did not reach significance in non-smoker subset (q=0.079), likely reflecting reduced statistical power (n_CF=64, n_PF=55) rather than a genuine absence of effect. Female vs Male not significant (consistent with full sample). All comparisons: Mann-Whitney U; BH-FDR applied across all 6 pairwise comparisons within this table.* | | | | | | |
| **Comparison** | **na** | **nb** | **U** | **r** | **q** | **Interpretation** |
| CF vs CM | 64 | 45 | 1300 | 0.097 | 0.4580(ns) | CF≈CM |
| PF vs PM | 55 | 42 | 1348 | 0.168 | 0.2225(ns) | PF≈PM |
| CF vs PF | 64 | 55 | 2137 | 0.214 | 0.0796(ns) | CF>PF trend (ns; reduced power) |
| CM vs PM | 45 | 42 | 1389 | 0.470 | 0.0003* | CM>PM |
| Clinical vs Preclinical | 109 | 97 | 6943 | 0.313 | 0.0003* | Clinical>Preclinical |
| Female vs Male | 119 | 87 | 5270 | 0.018 | 0.8211(ns) | F≈M |

*The overall clinical vs preclinical rank-biserial r = 0.313 in non-smokers is consistent with the full-sample estimate (r = 0.302), supporting robustness of the primary academic year effect.*
