# Supplementary material
Source: Research Square preprint supplement (doi:10.21203/rs.3.rs-10221135/v1)
Supplement: Supplementary file 3 [file 7c21dc739457719daad3b15c.docx]

| **Table 3. HU-DBI total scores and clinical periodontal indices by academic level and gender** | | | | | | |
| --- | --- | --- | --- | --- | --- | --- |
| **A) HU-DBI Total Score (items 1–20; range 0–20; n=264)** | | | | | | |
| **Group** | **n** | **Mean ± SD** | **Median [IQR]** | **Comparison** | **Effect size** | **p** |
| Clinical | 130 | 11.88 ± 2.12 | 12.0 [11.0–13.0] | Clinical vs Preclinical | U=11344, r=0.302, d=0.58 [0.34–0.84] | < 0.001 |
| Preclinical | 134 | 10.83 ± 1.45 | 11.0 [10.0–12.0] |  |  |  |
| Female | 144 | 11.32 ± 1.93 | 12.0 [10.0–12.0] | Female vs Male | U=8788, r=0.017 | 0.806 |
| Male | 120 | 11.38 ± 1.83 | 11.0 [11.0–12.0] |  |  |  |
| Clinical Female (CF) | 72 | 11.67 ± 2.33 | 12.0 [11.0-13.0] | SRH Year×Gender (HU-DBI): | H(1) = 2.12, p = 0.145 (NS) |  |
| Clinical Male (CM) | 58 | 12.14 ± 1.81 | 12.0 [11.0-14.0] |  |  |  |
| Preclinical Female (PF) | 72 | 10.97 ± 1.34 | 11.0 [10.0-12.0] |  |  |  |
| Preclinical Male (PM) | 62 | 10.66 ± 1.56 | 11.0 [10.0-12.0] |  |  |  |
|  |  |  |  |  |  |  |
| *Shapiro–Wilk confirmed non-normality in all groups (p<0.05); Mann–Whitney U used throughout. r = rank-biserial correlation (small = 0.10, medium = 0.30, large = 0.50; benchmarks per Cohen, 1988). d = Cohen’s d (bootstrap 95%CI, 2000 iterations; seed = 42); reported as a descriptive measure only - rank-biserial r is the inferential effect size for non-normally distributed data. Pooled male and female rows in Tables 3B-3C combine subgroups with markedly different distributions (bimodal); mean ± SD for these rows should be interpreted with caution. NS = not significant: p>0.05. SRH = Scheirer–Ray–Hare non-parametric two-way test.* | | | | | | |
|  |  |  |  |  |  |  |
| **B) Plaque Index — PI (Silness–Löe, 0–3; n=255)** | | | | | | |
| **Group** | **n** | **Mean ± SD** | **Median [IQR]** | **Comparison** | **U, r** | **p** |
| Clinical Female (CF) | 70 | 0.498 ± 0.230 | 0.485 [0.343–0.677] | Clinical vs Preclinical | U=176, r=0.978 | < 0.001 |
| Clinical Male (CM) | 55 | 0.232 ± 0.156 | 0.210 [0.115–0.340] | CF vs CM | U=3180, r=0.652 | < 0.001 |
| Preclinical Female (PF) | 68 | 1.111 ± 0.249 | 1.155 [0.970–1.248] | PF vs PM | U=33, r=0.984 | < 0.001 |
| Preclinical Male (PM) | 62 | 1.969 ± 0.270 | 1.970 [1.785–2.150] | CF vs PF | U=172, r=0.928 | < 0.001 |
| Clinical (all) | 125 | 0.381 ± 0.240 | 0.360 [0.180–0.540] | CM vs PM | U=0, r=1.000 | < 0.001 |
| Preclinical (all) | 130 | 1.540 ± 0.504 | 1.480 [1.127–1.968] | Female vs Male (all) | U=6949, r=0.139 | 0.056 |
| Female (all) | 138 | 0.793 ± 0.391 | 0.760 [0.477–1.143] |  |  |  |
| Male (all) | 117 | 1.173 ± 0.897 | 1.560 [0.220–1.980] |  |  |  |

*No participant had PPD > 3 mm; all subgroup comparisons for PPD were non-significant (all p>0.05), confirming absence of periodontal pocketing across all groups.*

| **C) Gingival Index — GI (Löe–Silness, 0–3; n=255)** | | | | | | |
| --- | --- | --- | --- | --- | --- | --- |
| **Group** | **n** | **Mean ± SD** | **Median [IQR]** | **Comparison** | **U, r** | **p** |
| Clinical Female (CF) | 70 | 1.432 ± 0.304 | 1.375 [1.222–1.640] | Clinical vs Preclinical | U=836, r=0.897 | < 0.001 |
| Clinical Male (CM) | 55 | 0.662 ± 0.233 | 0.670 [0.530–0.825] | CF vs CM | U=3782, r=0.964 | < 0.001 |
| Preclinical Female (PF) | 68 | 1.803 ± 0.237 | 1.770 [1.660–1.962] | PF vs PM | U=96, r=0.954 | < 0.001 |
| Preclinical Male (PM) | 62 | 2.559 ± 0.308 | 2.510 [2.325–2.850] | CF vs PF | U=822, r=0.655 | < 0.001 |
| Clinical (all) | 125 | 1.093 ± 0.472 | 1.120 [0.740–1.430] | CM vs PM | U=0, r=1.000 | < 0.001 |
| Preclinical (all) | 130 | 2.183 ± 0.467 | 2.150 [1.760–2.490] | Female vs Male (all) | U=7632, r=0.055 | 0.453 |
| Female (all) | 138 | 1.613 ± 0.333 | 1.650 [1.363–1.840] |  |  |  |
| Male (all) | 117 | 1.689 ± 0.988 | 2.090 [0.710–2.530] |  |  |  |
|  |  |  |  |  |  |  |
| **D) Scheirer–Ray–Hare Two-Way Interaction Tests** | | | | | | |
| **Index** | **Factor** | **H(1)** | **p** | **Interpretation** |  |  |
| HU-DBI | Academic Year | 18.97 | < 0.001 | Clinical > Preclinical (d=0.58, medium effect) |  |  |
| HU-DBI | Gender | 0.06 | 0.806 | Not significant |  |  |
| HU-DBI | Year × Gender | 2.12 | 0.145 | Not significant |  |  |
| PI | Academic Year | 183.00 | < 0.001 | Clinical < Preclinical (r=0.978, very large) |  |  |
| PI | Gender (overall) | 3.68 | 0.055 | Not significant overall |  |  |
| PI | Year × Gender | 33.42 | < 0.001 | Significant interaction — gender effect reverses between academic years |  |  |
| GI | Academic Year | 153.87 | < 0.001 | Clinical < Preclinical (r=0.903, very large) |  |  |
| GI | Gender (overall) | 0.57 | 0.452 | Not significant overall |  |  |
| GI | Year × Gender | 61.75 | < 0.001 | Significant interaction — gender effect reverses between academic years |  |  |
|  |  |  |  |  |  |  |
| *Five of six pairwise PI comparisons and five of six GI comparisons significant after BH-FDR (all q < 0.001); overall Female vs Male comparison not significant for either PI (q=0.056) or GI (q = 0.453).* | | | | | | |
|  |  |  |  |  |  |  |
|  |  |  |  |  |  |  |
