# Supplementary material
Source: Research Square preprint supplement (doi:10.21203/rs.3.rs-10221135/v1)
Supplement: Supplementary file 4 [file bec1048d6a5d5c759f14476e.docx]

| **Additional file 5. Spearman PI–GI Correlations (n=255)** | | | | |
| --- | --- | --- | --- | --- |
| **Group** | **n** | **rs** | **95% CI** | **p value** |
| All | 255 | 0.851 | [0.813–0.882] | <0.001 |
| Clinical | 125 | 0.456 | [0.304–0.584] | <0.001 |
| Preclinical | 130 | 0.747 | [0.660–0.815] | <0.001 |
| Female (F) | 138 | 0.519 | [0.384–0.633] | <0.001 |
| Male (M) | 117 | 0.754 | [0.665–0.822] | <0.001 |
| Clinical Female (CF) | 70 | 0.025 | [-0.211–0.258] | 0.837 (NS) |
| Clinical Male (CM) | 55 | 0.113 | [-0.157–0.367] | 0.412 (NS) |
| Preclinical Female (PF) | 68 | 0.270 | [0.034–0.478] | 0.026 |
| Preclinical Male (PM) | 62 | -0.050 | [-0.297–0.202] | 0.697 (NS) |
| *95% CIs via Fisher's z-transformation. The pooled rs = 0.851 reflects predominantly between-group heterogeneity rather than within-individual plaque–inflammation coupling; within-group correlations are non-significant in three of four subgroups (see Figure 3 and Results). NS=non-significant* | | | | |
