# Supplementary material
Source: Research Square preprint supplement (doi:10.21203/rs.3.rs-10221135/v1)
Supplement: Supplementary file 5 [file c1d2280c0f7b802ab0e0ad75.docx]

| Table 4. HU-DBI item responses by academic level and gender (n=264) | | | | | | | | | | |
| --- | --- | --- | --- | --- | --- | --- | --- | --- | --- | --- |
| Item | **Academic level** | | | | | **Gender** | | | | |
|  | **CF(72) n(%)** | **CM(58) n(%)** | **PF(72) n(%)** | **PM(62) n(%)** | **p (q) YP** | **F(144) n(%)** | **M(120) n(%)** | **p GP** | **q GP** | **Sig** |
| Q1 | 51(71%) | 56(97%) | 12(17%) | 9(15%) | **<0.001** | 63(44%) | 65(54%) | 0.0917 | 0.1147 |  |
| Q2 | 23(32%) | 41(71%) | 60(83%) | 53(85%) | **<0.001** | 83(58%) | 94(78%) | **<0.001** | **0.001** | * |
| Q3 | 29(40%) | 22(38%) | 36(50%) | 31(50%) | 0.079 | 65(45%) | 53(44%) | 0.8743 | 0.8743 |  |
| Q4 | 22(31%) | 57(98%) | 60(83%) | 53(85%) | **<0.001** | 82(57%) | 110(92%) | **<0.001** | **<0.001** | * |
| Q5 | 36(50%) | 52(90%) | 24(33%) | 22(35%) | **<0.001** | 60(42%) | 74(62%) | **0.001** | **0.002** | * |
| Q6 | 51(71%) | 6(10%) | 72(100%) | 62(100%) | **<0.001** | 123(85%) | 68(57%) | **<0.001** | **<0.001** | * |
| Q7 | 57(79%) | 18(31%) | 36(50%) | 0(0%) | **<0.001** | 93(65%) | 18(15%) | **<0.001** | **<0.001** | * |
| Q8 | 65(90%) | 0(0%) | 0(0%) | 0(0%) | **<0.001** | 65(45%) | 0(0%) | **<0.001** | **<0.001** | * |
| Q9 | 62(86%) | 57(98%) | 25(35%) | 25(40%) | **<0.001** | 87(60%) | 82(68%) | 0.1820 | 0.2142 |  |
| Q10 | 22(31%) | 12(21%) | 72(100%) | 62(100%) | **<0.001** | 94(65%) | 74(62%) | 0.5436 | 0.5722 |  |
| Q11 | 29(40%) | 58(100%) | 72(100%) | 62(100%) | **<0.001** | 101(70%) | 120(100%) | **<0.001** | **<0.001** | * |
| Q12 | 58(81%) | 0(0%) | 0(0%) | 0(0%) | **<0.001** | 58(40%) | 0(0%) | **<0.001** | **<0.001** | * |
| Q13 | 50(69%) | 23(40%) | 24(33%) | 22(35%) | **<0.001** | 74(51%) | 45(38%) | 0.0239 | **0.0319** | * |
| Q14 | 22(31%) | 41(71%) | 24(33%) | 22(35%) | **0.020** | 46(32%) | 63(53%) | **<0.001** | **0.0012** | * |
| Q15 | 23(32%) | 52(90%) | 72(100%) | 62(100%) | **<0.001** | 95(66%) | 114(95%) | **<0.001** | **<0.001** | * |
| Q16 | 65(90%) | 36(62%) | 12(17%) | 9(15%) | **<0.001** | 77(53%) | 45(38%) | 0.0095 | **0.0136** | * |
| Q17 | 66(92%) | 57(98%) | 45(63%) | 43(69%) | **<0.001** | 111(77%) | 100(83%) | 0.2068 | 0.2298 |  |
| Q18 | 23(32%) | 46(79%) | 72(100%) | 62(100%) | **<0.001** | 95(66%) | 108(90%) | **<0.001** | **<0.001** | * |
| Q19 | 21(29%) | 58(100%) | 72(100%) | 62(100%) | **<0.001** | 93(65%) | 120(100%) | **<0.001** | **<0.001** | * |
| Q20 | 65(90%) | 12(21%) | 0(0%) | 0(0%) | **<0.001** | 65(45%) | 12(10%) | **<0.001** | **<0.001** | * |
|  |  |  |  |  |  |  |  |  |  |  |
