# Supplementary material
Source: Research Square preprint supplement (doi:10.21203/rs.3.rs-10221135/v1)
Supplement: Supplementary file 6 [file d1c9e25bab261134b506e9f5.docx]

| **Table 1. Modified Turkish HU-DBI questionnaire items (items 1–20 scored; items 21–27 supplementary)** | | |
| --- | --- | --- |
| **Scored HU-DBI items (items 1–20; total score range 0–20; higher scores indicate more positive oral health attitudes and behaviors)** | | |
| **Item** | **Statement** | **Score 1 if response indicates:** |
| **Q1** | I brush my teeth immediately after waking up in the morning | Favorable behavior (agree) |
| **Q2** | My gums tend to bleed when I brush my teeth | Favorable behavior (disagree) |
| **Q3** | I am worried about the color of my teeth | Favorable behavior (disagree) |
| **Q4** | I notice white sticky deposits on my teeth | Favorable behavior (disagree) |
| **Q5** | I use a toothpick | Favorable behavior (agree) |
| **Q6** | I think I will inevitably have false teeth when I get old | Favorable behavior (disagree) |
| **Q7** | I brush my teeth using a circular method | Favorable behavior (agree) |
| **Q8** | I have my teeth checked at least once a year | Favorable behavior (agree) |
| **Q9** | I think it is important to maintain natural teeth as long as possible | Favorable behavior (agree) |
| **Q10** | I have never had formal instruction on how to brush my teeth | Favorable behavior (disagree) |
| **Q11** | I sometimes brush my teeth without using toothpaste | Favorable behavior (disagree) |
| **Q12** | I examine my teeth in a mirror after brushing | Favorable behavior (agree) |
| **Q13** | I think I will have my own teeth for the rest of my life | Favorable behavior (agree) |
| **Q14** | I feel toothbrushing alone is insufficient to keep my teeth clean | Favorable behavior (agree) |
| **Q15** | I tend to postpone visiting the dentist until I have a toothache | Favorable behavior (disagree) |
| **Q16** | I have used a dental disclosing agent to check my toothbrushing | Favorable behavior (agree) |
| **Q17** | I do not use a hard-bristled toothbrush | Favorable behavior (agree) |
| **Q18** | I brush my teeth using a horizontal scrub method | Favorable behavior (disagree) |
| **Q19** | I sometimes think that brushing my teeth takes too much time | Favorable behavior (disagree) |
| **Q20** | I have been told by a dentist how well I brush my teeth | Favorable behavior (agree) |
|  |  |  |
| **Supplementary items (not included in total score)** | | |
| **21** | I am satisfied with the color of my teeth | *Descriptive (not scored)* |
| **22** | I brush my teeth twice a day or more | *Descriptive (not scored)* |
| **23** | I use dental floss to clean between my teeth | *Descriptive (not scored)* |
| **24** | I use a mouthwash regularly | *Descriptive (not scored)* |
| **25** | I currently smoke | *Smoking behavior* |
| **26** | If yes: I smoke ≥ half a pack per day | *Smoking behavior* |
| **27** | If yes: I have been smoking for ≥ 1 year | *Smoking behavior* |
|  |  |  |
| *Scored items (1–20) use a binary agree/disagree response format. Items are scored per the validated Turkish HU-DBI key (Peker et al. 2009; Ref 8): each item is assigned 1 for the response indicating a positive oral health behavior and 0 otherwise. Items 21–24 assess additional oral hygiene practices and were collected for descriptive purposes only; they are not scored in the HU-DBI total and are not tabulated in this manuscript. Items 25–27 assess smoking behaviour and are summarised in Table 2 [8].* | | |
