# Supplementary material
Source: Research Square preprint supplement (doi:10.21203/rs.3.rs-10221135/v1)
Supplement: Supplementary file 7 [file e114618c5ff96946e805748f.docx]

| **Table 2. Demographic characteristics and smoking behavior (HU-DBI n=264; clinical examination n=255)** | | | |
| --- | --- | --- | --- |
| **Variable** | **Preclinical (n=134)** | **Clinical (n=130)** | **Total (n=264)** |
| Sex |  |  |  |
| Female (F), n (%) | 72 (53.7%) | 72 (55.4%) | 144 (54.5%) |
| Male (M), n (%) | 62 (46.3%) | 58 (44.6%) | 120 (45.5%) |
| Age (years), mean ± SD | *19.18*±0.74 | 21.27±1.02 | 20.21 ± 1.37 |
| Academic year distribution |  |  |  |
| Year 1, n (%) | *70 (52.2%)* | — | *70 (26.5%)* |
| Year 2, n (%) | *64 (47.8%)* | — | *64 (24.2%)* |
| Year 3, n (%) | — | *46 (35.4%)* | *46 (17.4%)* |
| Year 4, n (%) | — | *44 (33.8%)* | *44 (16.7%)* |
| Year 5, n (%) | — | *40 (30.8%)* | *40 (15.2%)* |
| Smoking (from HU-DBI Smoking variable) |  |  |  |
| Clinical Female (CF), n (%) | — | 8/72 (11.1%) | 8/72 (11.1%) |
| Clinical Male (CM), n (%) | — | 13/58 (22.4%) | 13/58 (22.4%) |
| Preclinical Female (PF), n (%) | 17/72 (23.6%) | — | 17/72 (23.6%) |
| Preclinical Male (PM), n (%) | 20/62 (32.3%) | — | 20/62 (32.3%) |
| Total female, n (%) |  |  | 25/144 (17.4%) |
| Total male, n (%) |  |  | 33/120 (27.5%) |
| χ² (female vs male), p-value |  |  | χ²=3.356, p=0.067 (NS) |
| Clinical examination subgroup (n=255) |  |  |  |
| Clinical Female, n | — | 70 | 70 |
| Clinical Male, n | — | 55 | 55 |
| Preclinical Female, n | 68 | — | 68 |
| Preclinical Male, n | 62 | — | 62 |
|  |  |  |  |
| *NS = not significant (α=0.05). n(Preclinical)=134 (72F+62M), n(Clinical)=130 (72F+58M). Clinical exam subset: Preclinical Female n=68, Preclinical Male n=62, Clinical Female n=70, Clinical Male n=55 (Nine students who completed the HU-DBI did not attend the clinical examination­—two declined; seven absent on the examination day—).* | | | |
