# Supplementary material
Source: Research Square preprint supplement (doi:10.21203/rs.3.rs-10221135/v1)
Supplement: Supplementary file 8 [file ea5215f3f53489c83fbc961b.docx]

|  | | **Table 5. Periodontal status distribution approximated using available examination variables** | | | | | | |
| --- | --- | --- | --- | --- | --- | --- | --- | --- |
| **Group** | | | **Periodontal Health**  **GI < 1.0** | **Mild Gingivitis**  **1.0 ≤ GI < 2.0** | **Moderate Gingivitis**  **2.0 ≤ GI < 3.0** | **Severe Gingivitis**  **GI ≥ 3.0** | **Periodontitis**  **-** | **Total** |
| Clinical Female (CF) | | | 2(2.9%) | 65(92.9%) | 3(4.3%) | 0(0.0%) | 0 (0.0%) | 70 |
| Clinical Male (CM) | | | 53(96.4%) | 2(3.6%) | 0(0.0%) | 0(0.0%) | 0 (0.0%) | 55 |
| Preclinical Female (PF) | | | 0(0.0%) | 54(79.4%) | 14(20.6%) | 0(0.0%) | 0 (0.0%) | 68 |
| Preclinical Male (PM) | | | 0(0.0%) | 2(3.2%) | 53(85.5%) | 7(11.3%) | 0 (0.0%) | 62 |
| **Total (n=255)** | | | **55(21.6%)** | **123(48.2%)** | **70(27.5%)** | **7(2.7%)** | 0 (0.0%) | **255** |
|  | *Clinical periodontal categories were approximated using available examination variables (PI, GI, PPD); full classification per the 2017*  *World Workshop criteria[17,21] was not possible because bleeding on probing was not recorded as a dichotomous variable.Values presented as n (%). Periodontal health: mean GI < 1.0, PPD ≤ 3 mm, no CAL. Gingivitis on an intact periodontium: mean GI ≥ 1.0, PPD ≤ 3 mm, no CAL; severity subclassified as mild (1.0 ≤ GI < 2.0), moderate (2.0 ≤ GI < 3.0), or severe (GI ≥ 3.0). Mean GI was used as a surrogate for binary bleeding on probing (BOP), which was not recorded as a dichotomous variable; see Methods for validation rationale. No CAL or PPD > 3 mm was detected; periodontitis was absent in all participants. Radiographic bone loss assessment was not performed; the classification therefore reflects clinical criteria only. Fisher's exact test (Monte Carlo simulation, n = 10,000) was used in place of chi-square owing to expected cell counts < 5 in four of 16 cells (minimum expected count = 1.51): p < 0.001.* | | | | | | | |
